# Supplementary material
Source: publisher figshare collection journal article supplement (https://brill.figshare.com/articles/dataset/_/7092857)
Supplement: Supplementary file 3 [file 1]

# Metaphor clustering in discourse (Cameron & Stelma 2004)

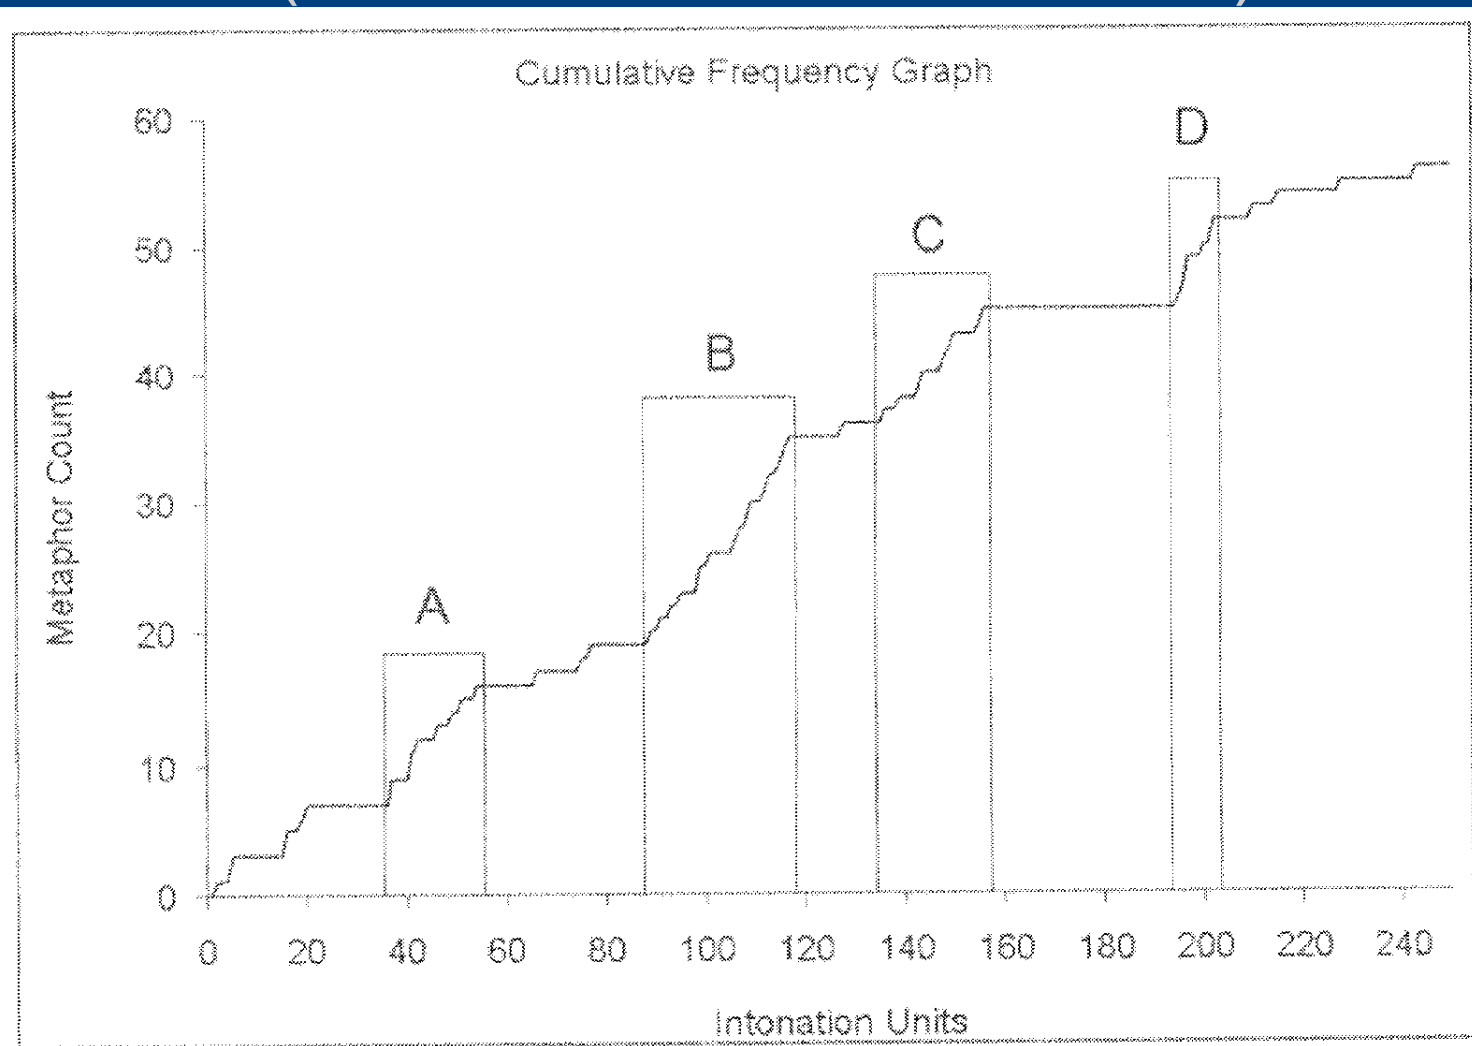

Figure 5: Cumulative frequency graph of initial 250 intonation units of first conciliation conversation
