# Supplementary material
Source: publisher figshare collection journal article supplement (https://brill.figshare.com/articles/dataset/_/7092857)

# Gesture

---

- Emblems (Efron 1941)
  - Standardized form/meaning relationship
  - Have fixed symbolic status within a culture
  - Intentionally used

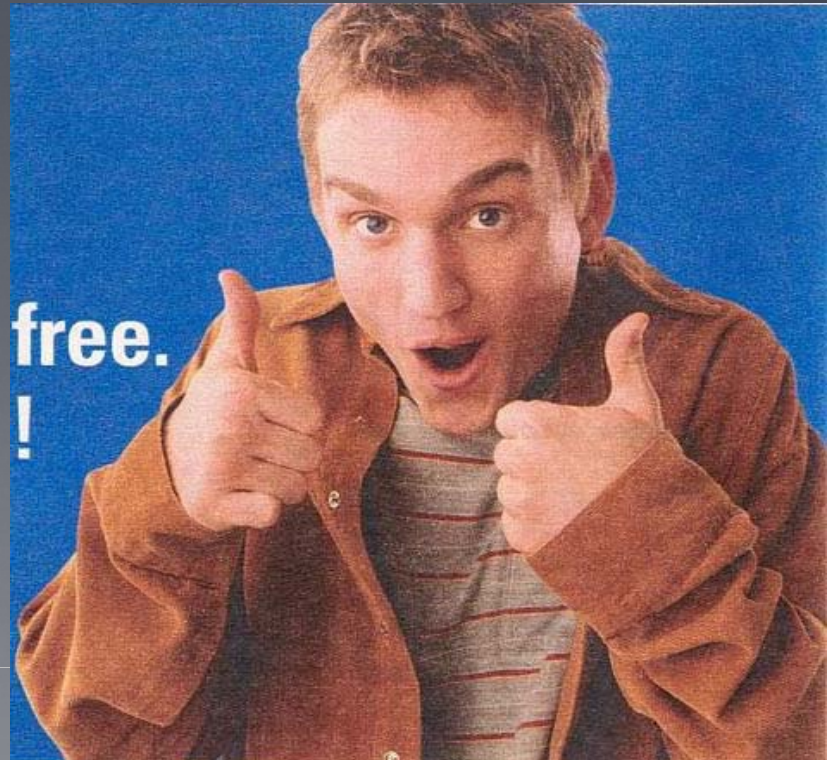

Supplement: Supplementary file 4 [file 1]
