# Supplementary material
Source: publisher figshare collection journal article supplement (https://brill.figshare.com/articles/dataset/_/7092857)

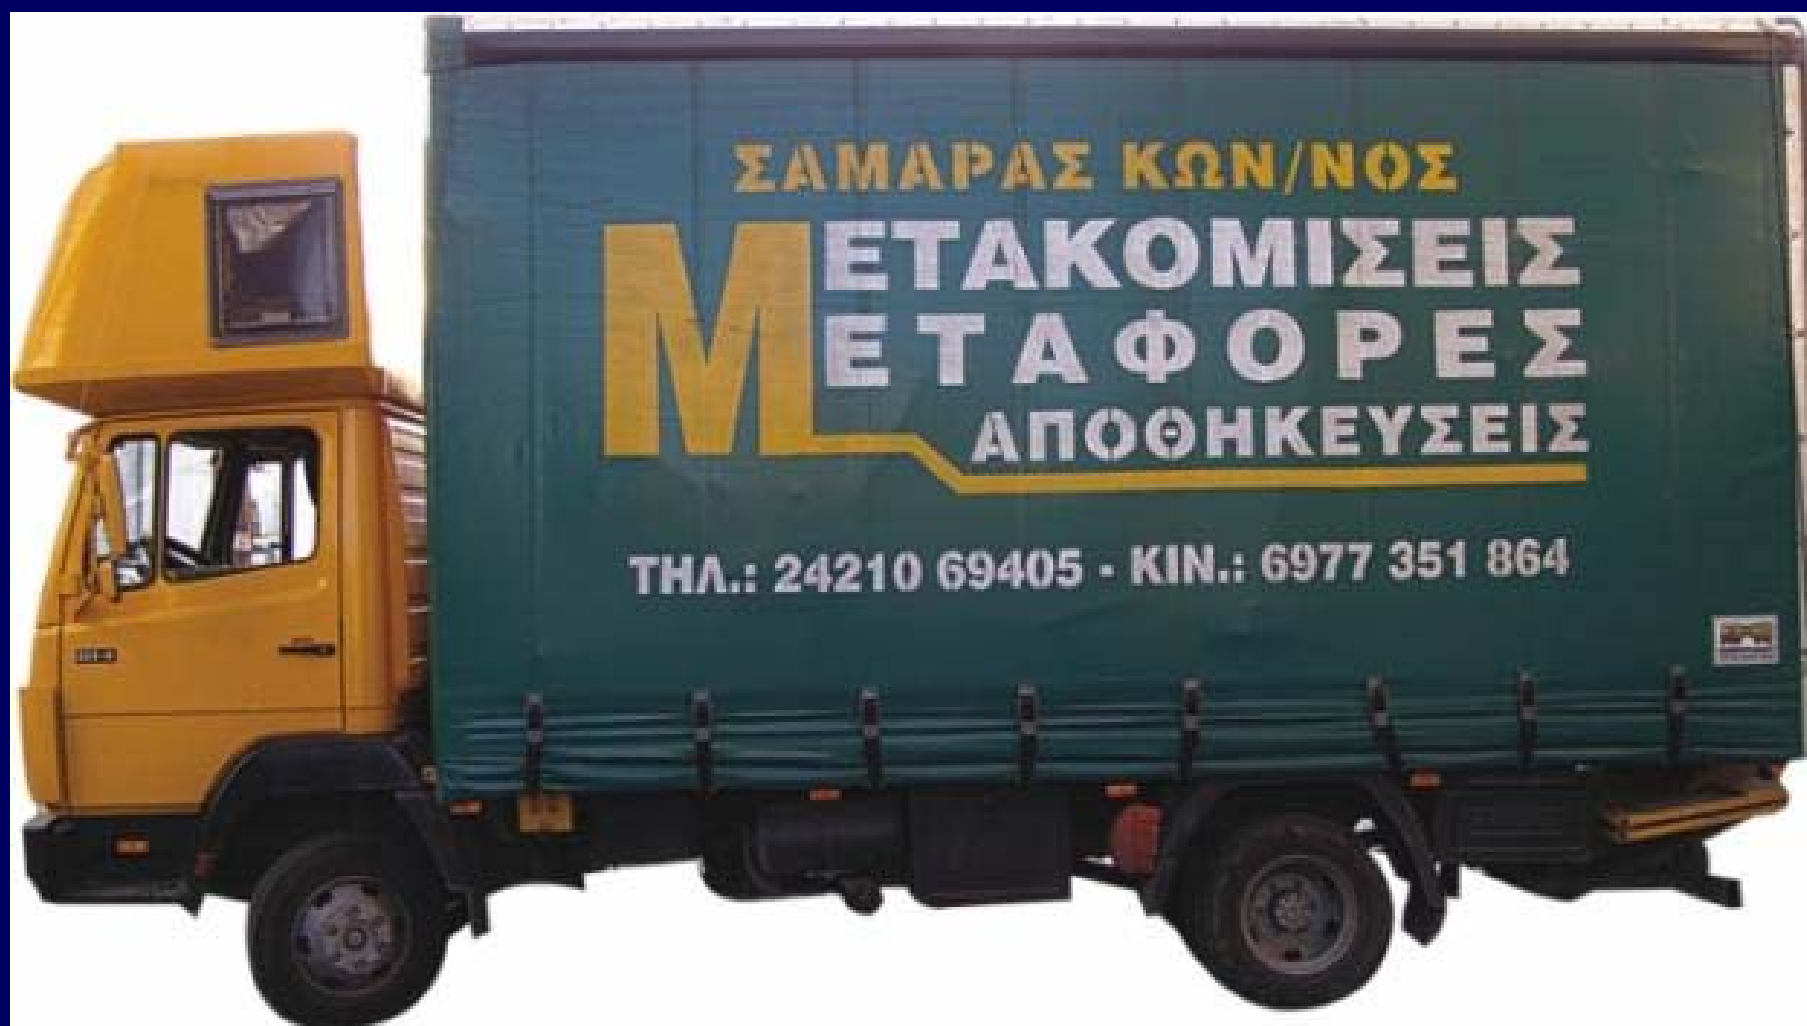

Supplement: Supplementary file 1 [file 1]

# Model of gesture space (McNeill 1992)

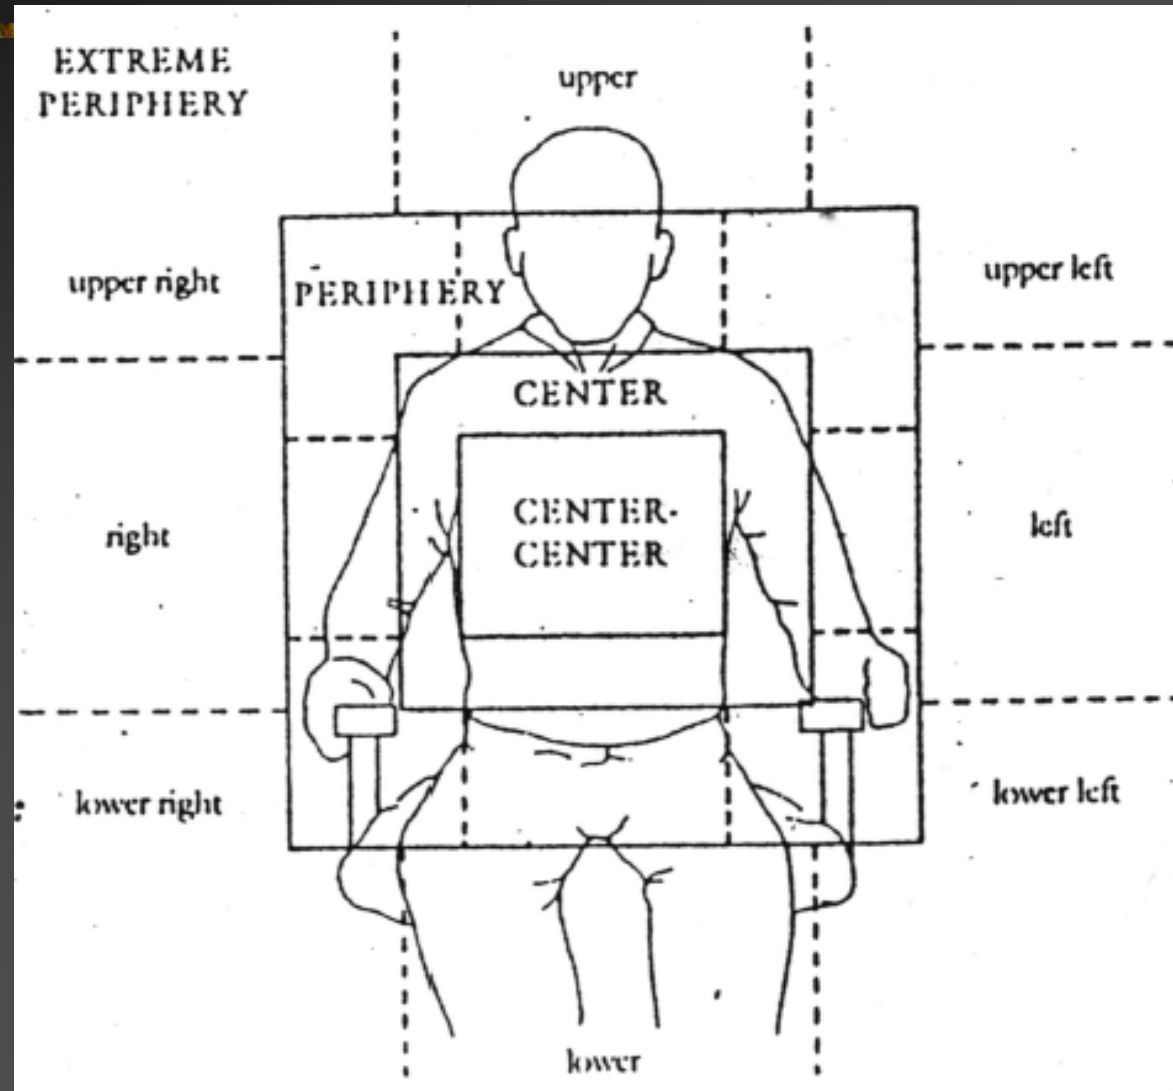

Supplement: Supplementary file 2 [file 1]
